# Supplementary material
Source: PubMed Central journal article supplement (PMC9433447)

# Supplementary Fig. S1

Kidney Renal Clear Cell Carcinoma (TCGA, PanCancer Atlas, 354 patients)

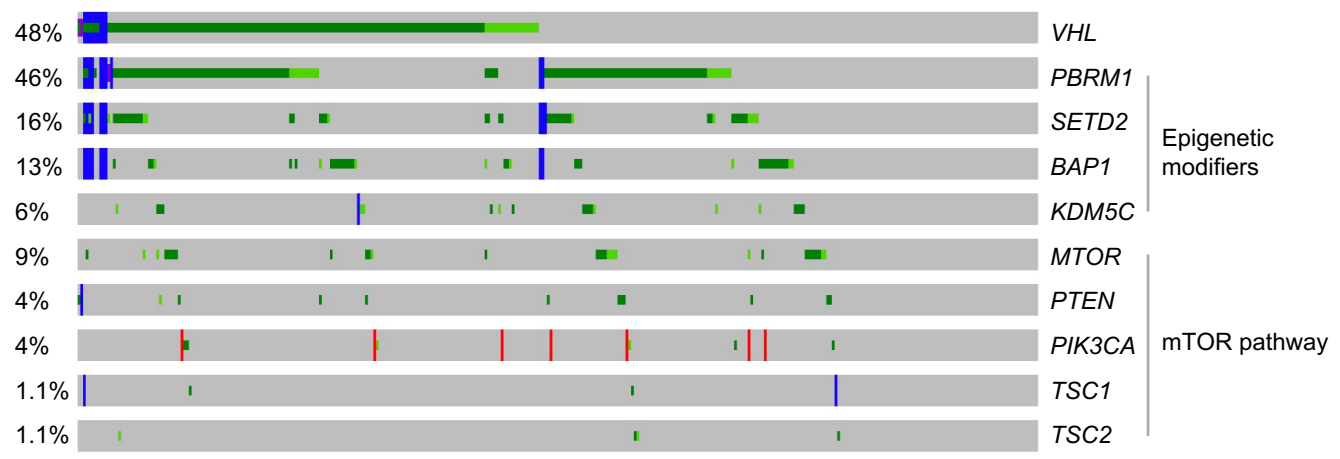

Genetic alteration:

- Mutation (putative driver)
- Mutation (unknown significance)
- Structural Variant (putative driver)
- Amplification
- Deep Deletion
- No alterations

Supplementary Fig. S2

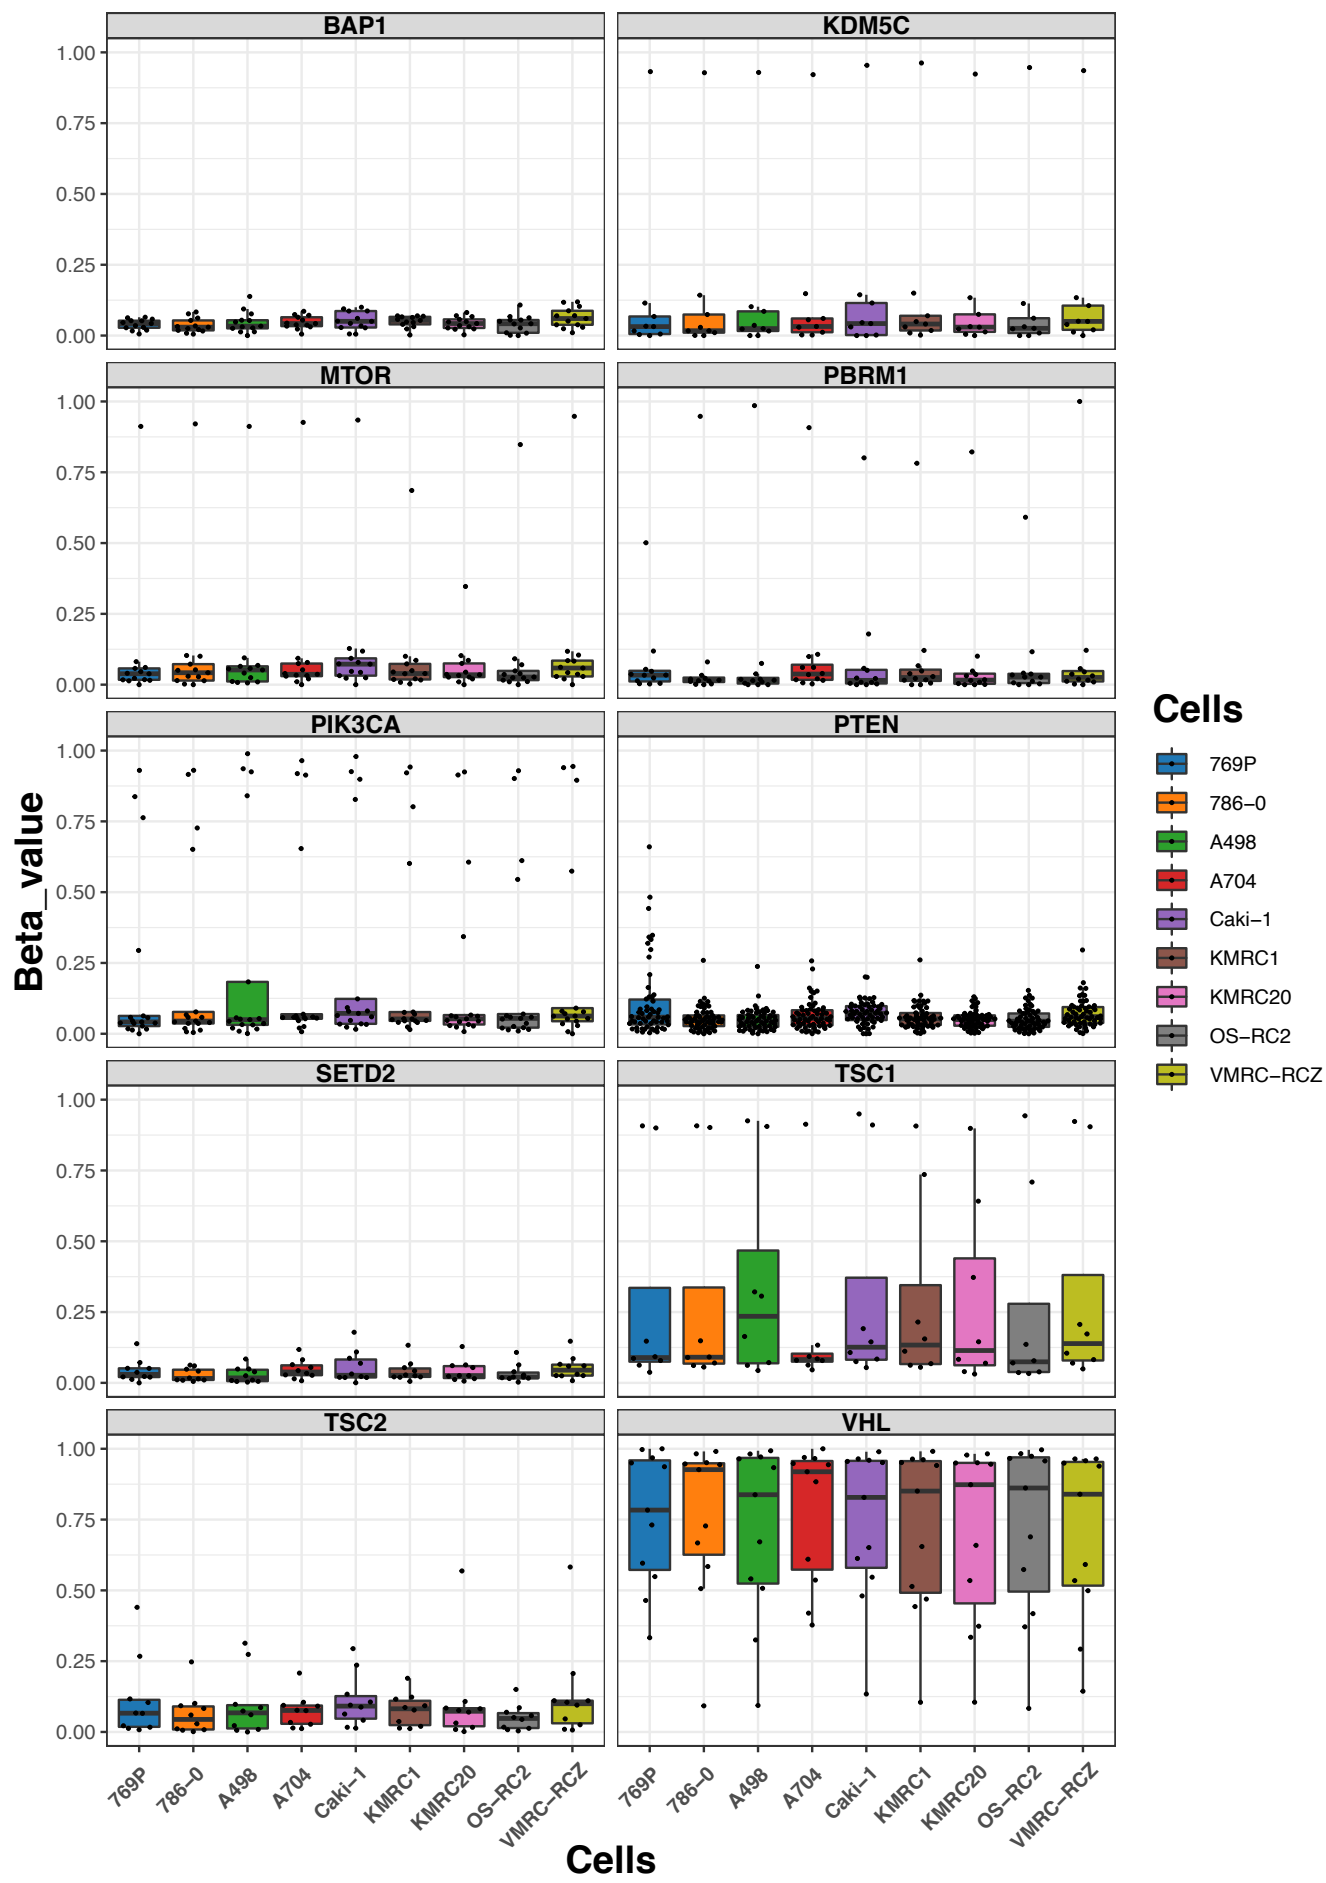



**Supplementary Fig. S4**

**a**

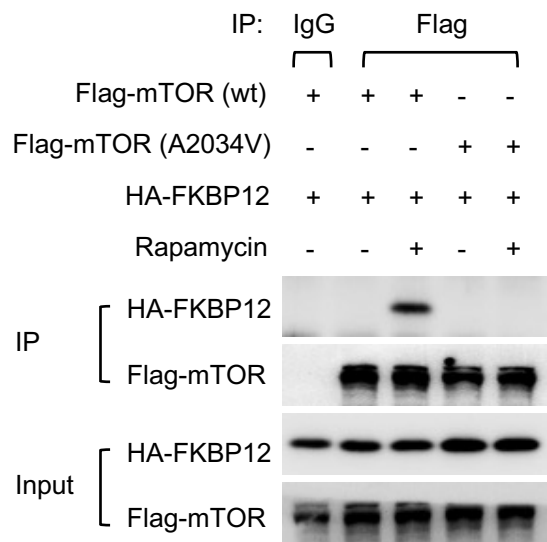

**b**

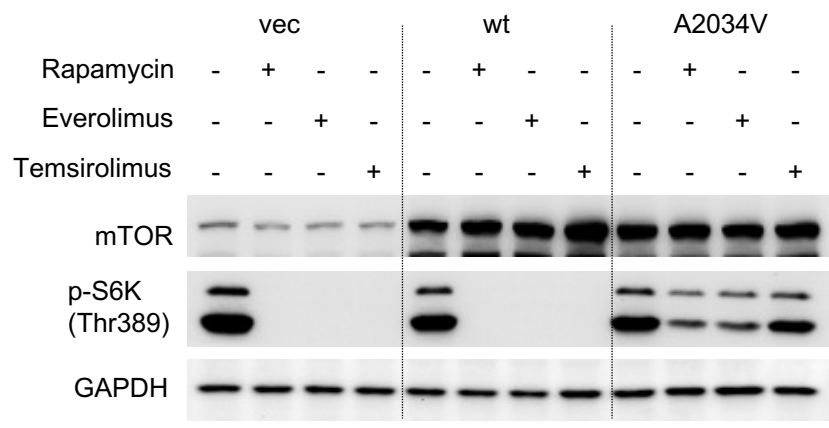

786O

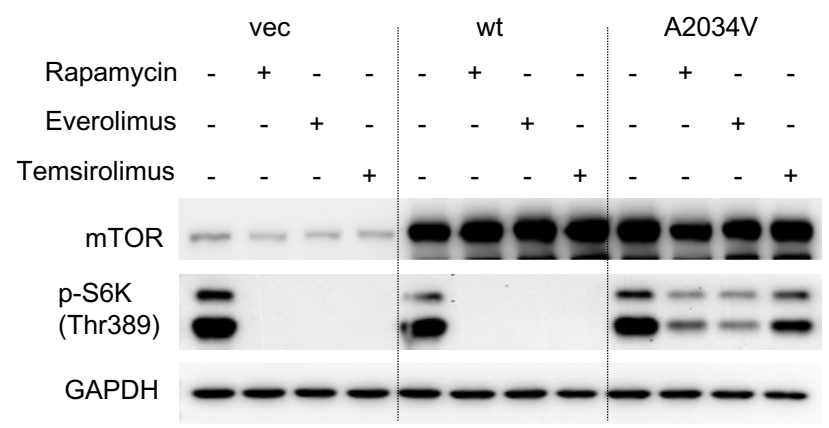

OS-RC2

# Supplementary Fig. S5

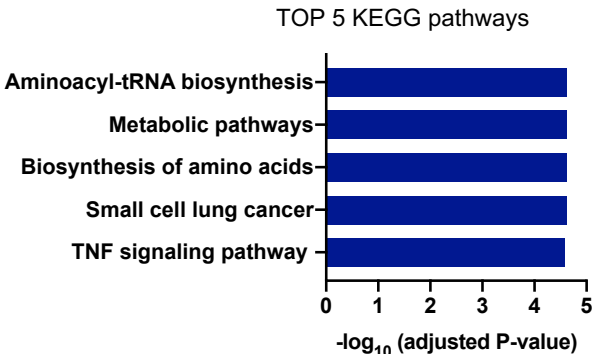

**Supplementary Fig. S6**

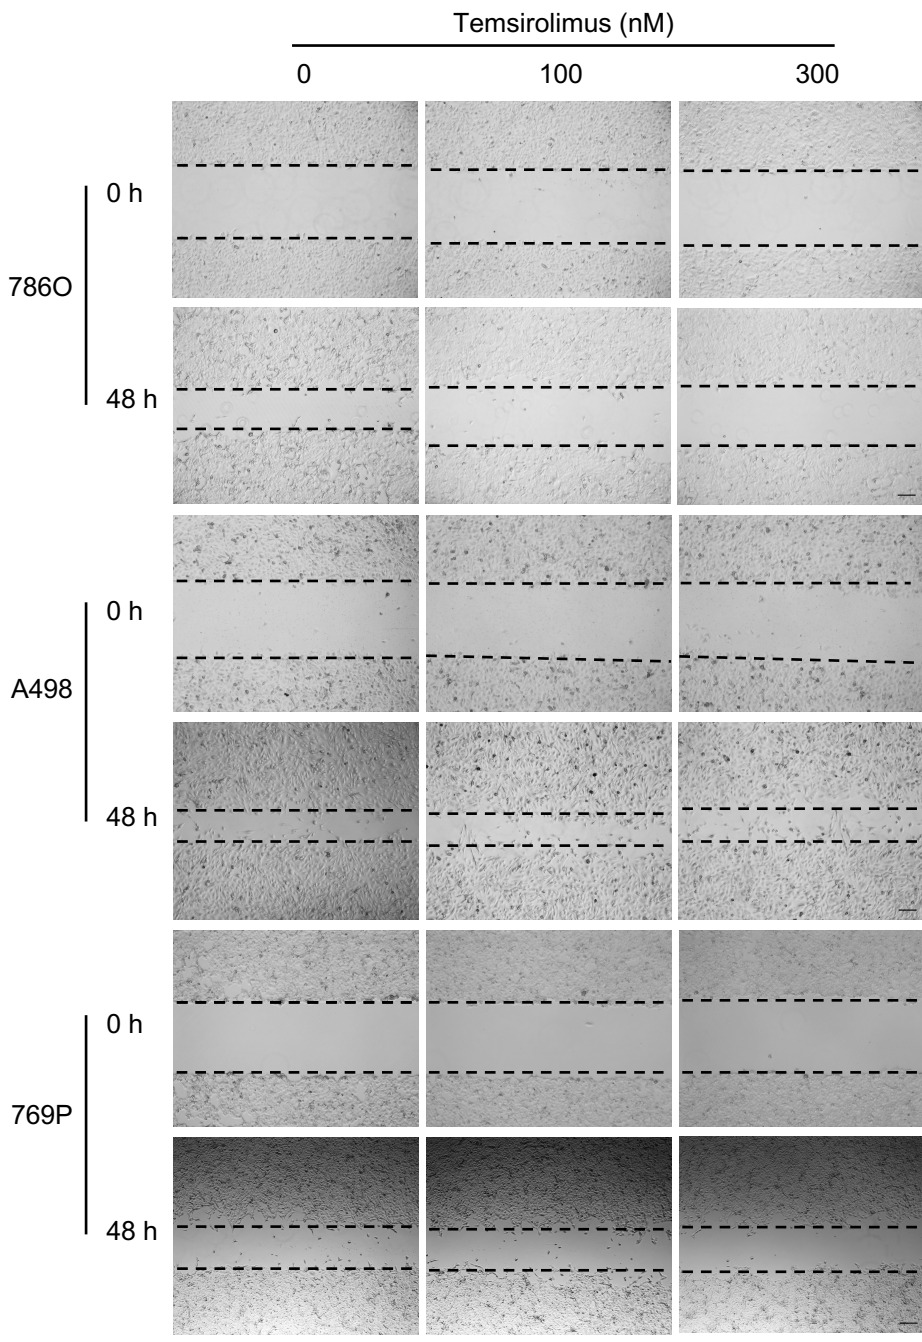

# Supplementary Fig. S7

**a**

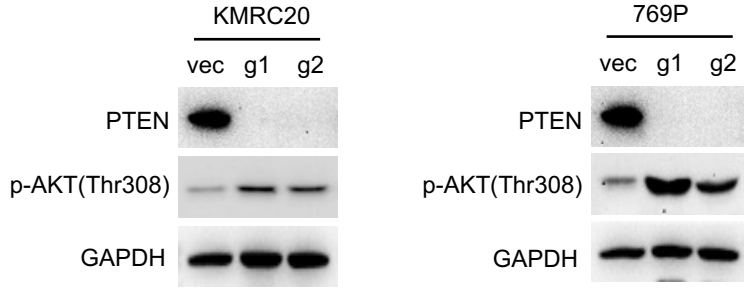

**b**

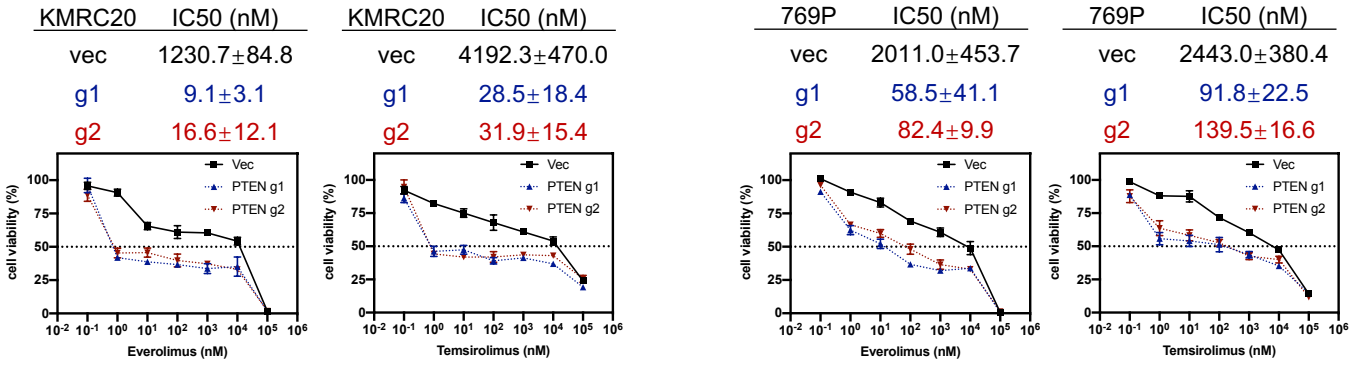

**c**

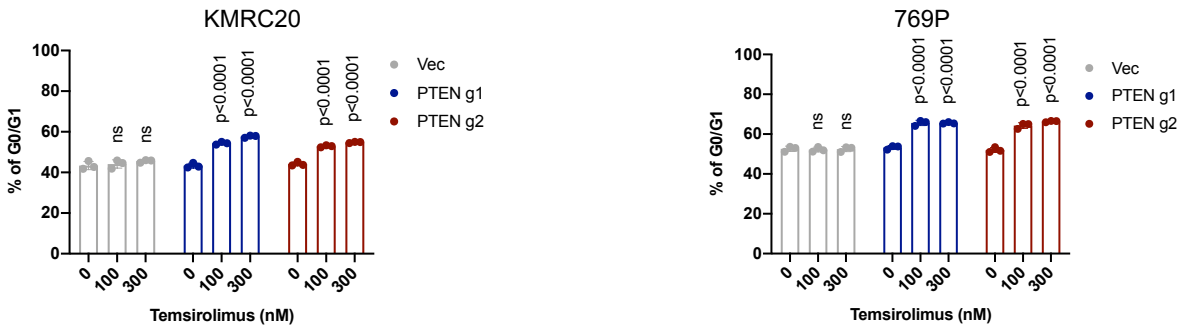

**d**

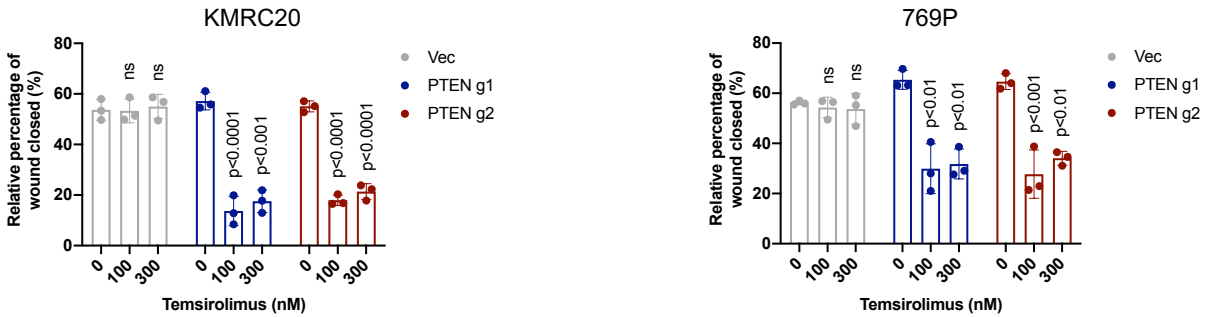

# Supplementary Fig. S8

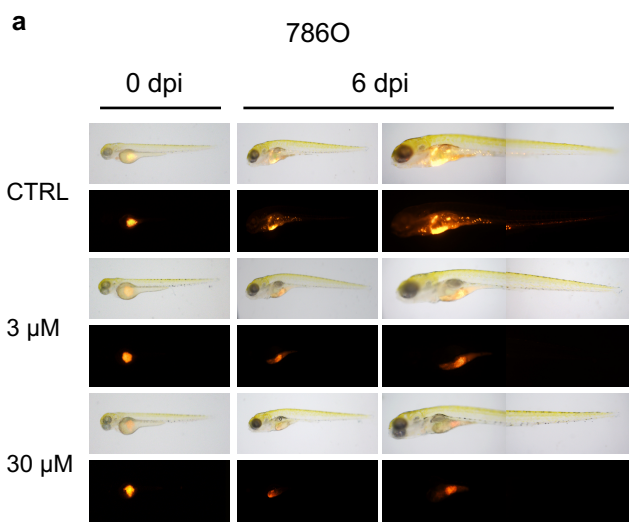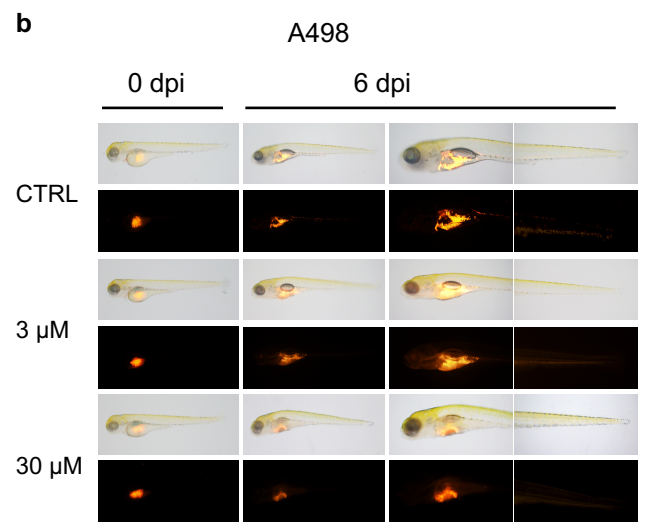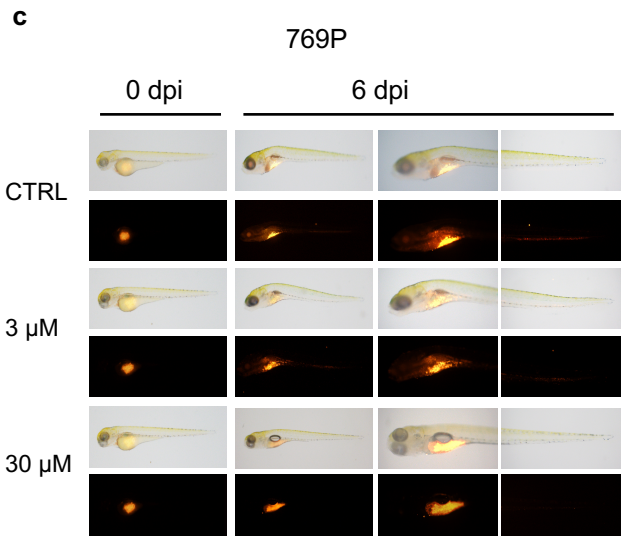



# Supplementary Fig. S9

**a**

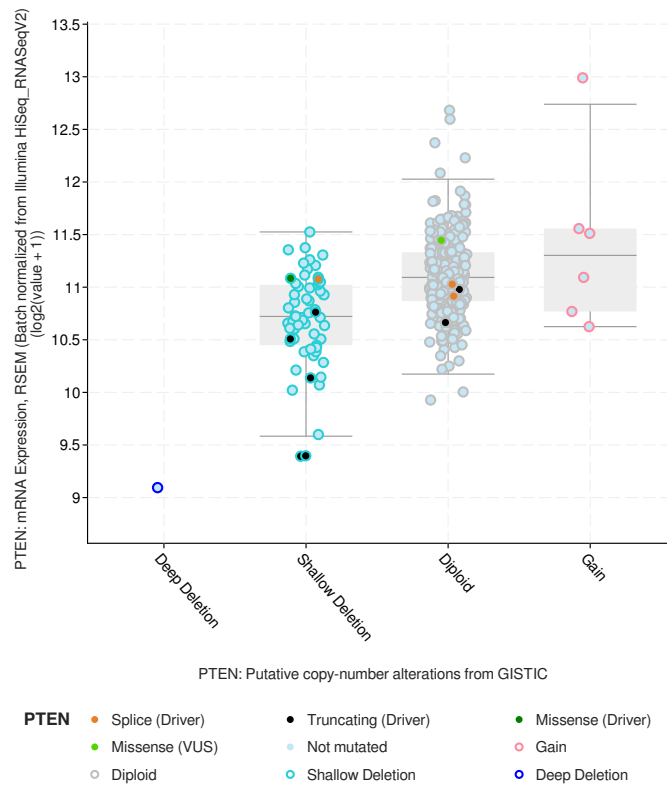

**b**

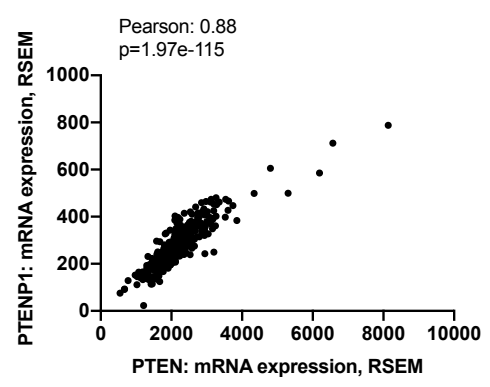

Supplement: 41401_2022_862_MOESM1_ESM.pdf [file 41401_2022_862_MOESM1_ESM.pdf]
